# Supplementary material for: In silico design of RORγ inverse agonists based on 3D-QSAR and molecular docking
Source: Royal Society of Chemistry journal article supplement (doi:10.1039/d1nj05185g), 2022-01-01
Supplement: d1nj05185g1.pdf [file d1nj05185g1.pdf]

## Electronic Supplementary Information (ESI)

### In silico design of ROR $\gamma$ inverse agonists based on 3D-QSAR and molecular docking

Renjin Deng,<sup>a</sup> Wenjing He,<sup>a</sup> Hongwei Guo,<sup>abc</sup> Zhiheng Su,<sup>ab</sup> Weijun Wu,<sup>a</sup> and Zheng Wu<sup>\*ab</sup>

**Table S1** Statistical parameters of the constructed CoMFA and CoMSIA models

| Model                        | q <sup>2</sup> | ONC  | SEE   | R <sup>2</sup> | F        | r <sub>pred</sub> <sup>2</sup> | Field contributions (%) |       |       |       |       |
|------------------------------|----------------|------|-------|----------------|----------|--------------------------------|-------------------------|-------|-------|-------|-------|
|                              |                |      |       |                |          |                                | S                       | E     | H     | D     | A     |
| S <sup>a</sup>               | 0.773          | 3    | 0.285 | 0.926          | 208.001  | 0.833                          | 1                       | -     | -     | -     | -     |
| E <sup>a</sup>               | 0.747          | 6    | 0.246 | 0.948          | 142.642  | 0.801                          | -                       | 1     | -     | -     | -     |
| <b>S+E<sup>a</sup></b>       | 0.846          | 9    | 0.069 | 0.996          | 1281.335 | 0.923                          | 0.610                   | 0.390 | -     | -     | -     |
| S+E <sup>b</sup>             | 0.791          | 4    | 0.259 | 0.940          | 191.510  | 0.909                          | 0.498                   | 0.502 | -     | -     | -     |
| S+D <sup>b</sup>             | 0.740          | 6    | 0.234 | 0.953          | 158.337  | 0.822                          | 0.622                   | -     | -     | 0.378 | -     |
| E+H <sup>b</sup>             | 0.737          | 5    | 0.212 | 0.961          | 233.479  | 0.902                          | -                       | 0.502 | 0.498 | -     | -     |
| S+H <sup>b</sup>             | 0.799          | 7    | 0.092 | 0.993          | 921.010  | 0.925                          | 0.453                   | -     | 0.547 | -     | -     |
| S+E+D <sup>b</sup>           | 0.782          | 8    | 0.133 | 0.986          | 383.508  | 0.908                          | 0.357                   | 0.401 | -     | 0.242 | -     |
| S+E+H <sup>b</sup>           | 0.786          | 4    | 0.211 | 0.960          | 293.817  | 0.936                          | 0.331                   | 0.355 | 0.314 | -     | -     |
| S+E+A <sup>b</sup>           | 0.825          | 6    | 0.155 | 0.979          | 372.186  | 0.925                          | 0.224                   | 0.297 | -     | -     | 0.479 |
| S+D+A <sup>b</sup>           | 0.786          | 5    | 0.187 | 0.969          | 304.587  | 0.789                          | 0.234                   | -     | -     | 0.233 | 0.532 |
| E+D+A <sup>b</sup>           | 0.818          | 8    | 0.121 | 0.988          | 462.524  | 0.905                          | -                       | 0.283 | -     | 0.219 | 0.499 |
| S+H+A <sup>b</sup>           | 0.806          | 4    | 0.176 | 0.972          | 429.228  | 0.902                          | 0.208                   | -     | 0.297 | -     | 0.495 |
| S+E+H+D <sup>b</sup>         | 0.775          | 8    | 0.104 | 0.991          | 628.147  | 0.928                          | 0.249                   | 0.284 | 0.263 | 0.203 | -     |
| S+E+H+A <sup>b</sup>         | 0.827          | 4    | 0.169 | 0.974          | 467.494  | 0.939                          | 0.173                   | 0.222 | 0.217 | -     | 0.387 |
| S+E+D+A <sup>b</sup>         | 0.818          | 8    | 0.106 | 0.991          | 609.228  | 0.908                          | 0.178                   | 0.243 | -     | 0.185 | 0.394 |
| E+H+D+A <sup>b</sup>         | 0.794          | 5    | 0.154 | 0.979          | 453.465  | 0.940                          | -                       | 0.220 | 0.219 | 0.176 | 0.385 |
| S+H+D+A <sup>b</sup>         | 0.781          | 4    | 0.195 | 0.966          | 349.352  | 0.900                          | 0.176                   | -     | 0.236 | 0.185 | 0.404 |
| <b>S+E+H+D+A<sup>b</sup></b> | 0.807          | 5    | 0.143 | 0.982          | 524.909  | 0.942                          | 0.139                   | 0.196 | 0.187 | 0.156 | 0.322 |
| Constraints                  | > 0.5          | < 10 | < < 1 | > 0.9          | > 100    | > 0.5                          | -                       | -     | -     | -     | -     |

<sup>a</sup> CoMFA model, <sup>b</sup>CoMSIA model; q<sup>2</sup>: cross-validated correlation coefficient using the leave-one-out methods; ONC: optimal number of principal components; SEE: standard error of estimate; R<sup>2</sup>: non-cross-validated correlation coefficient; F: Fischer F-ratio; r<sub>pred</sub><sup>2</sup>: external validation correlation coefficient; S: steric; E: electrostatic; H: hydrophobic; D: H-bond donor; A: H-bond acceptor.

<sup>a</sup> Pharmaceutical College, Guangxi Medical University, Nanning 530021, P. R. China

<sup>b</sup> Guangxi Key Laboratory of Bioactive Molecules Research and Evaluation, Guangxi Medical University, Nanning 530021, P. R. China

<sup>c</sup> Key Laboratory of Longevity and Aging-related Diseases of Chinese Ministry of Education & Center for Translational Medicine, Guangxi Medical University, Nanning 530021, P. R. China

\* Corresponding Author

Email: wuzheng@gxmu.edu.cn

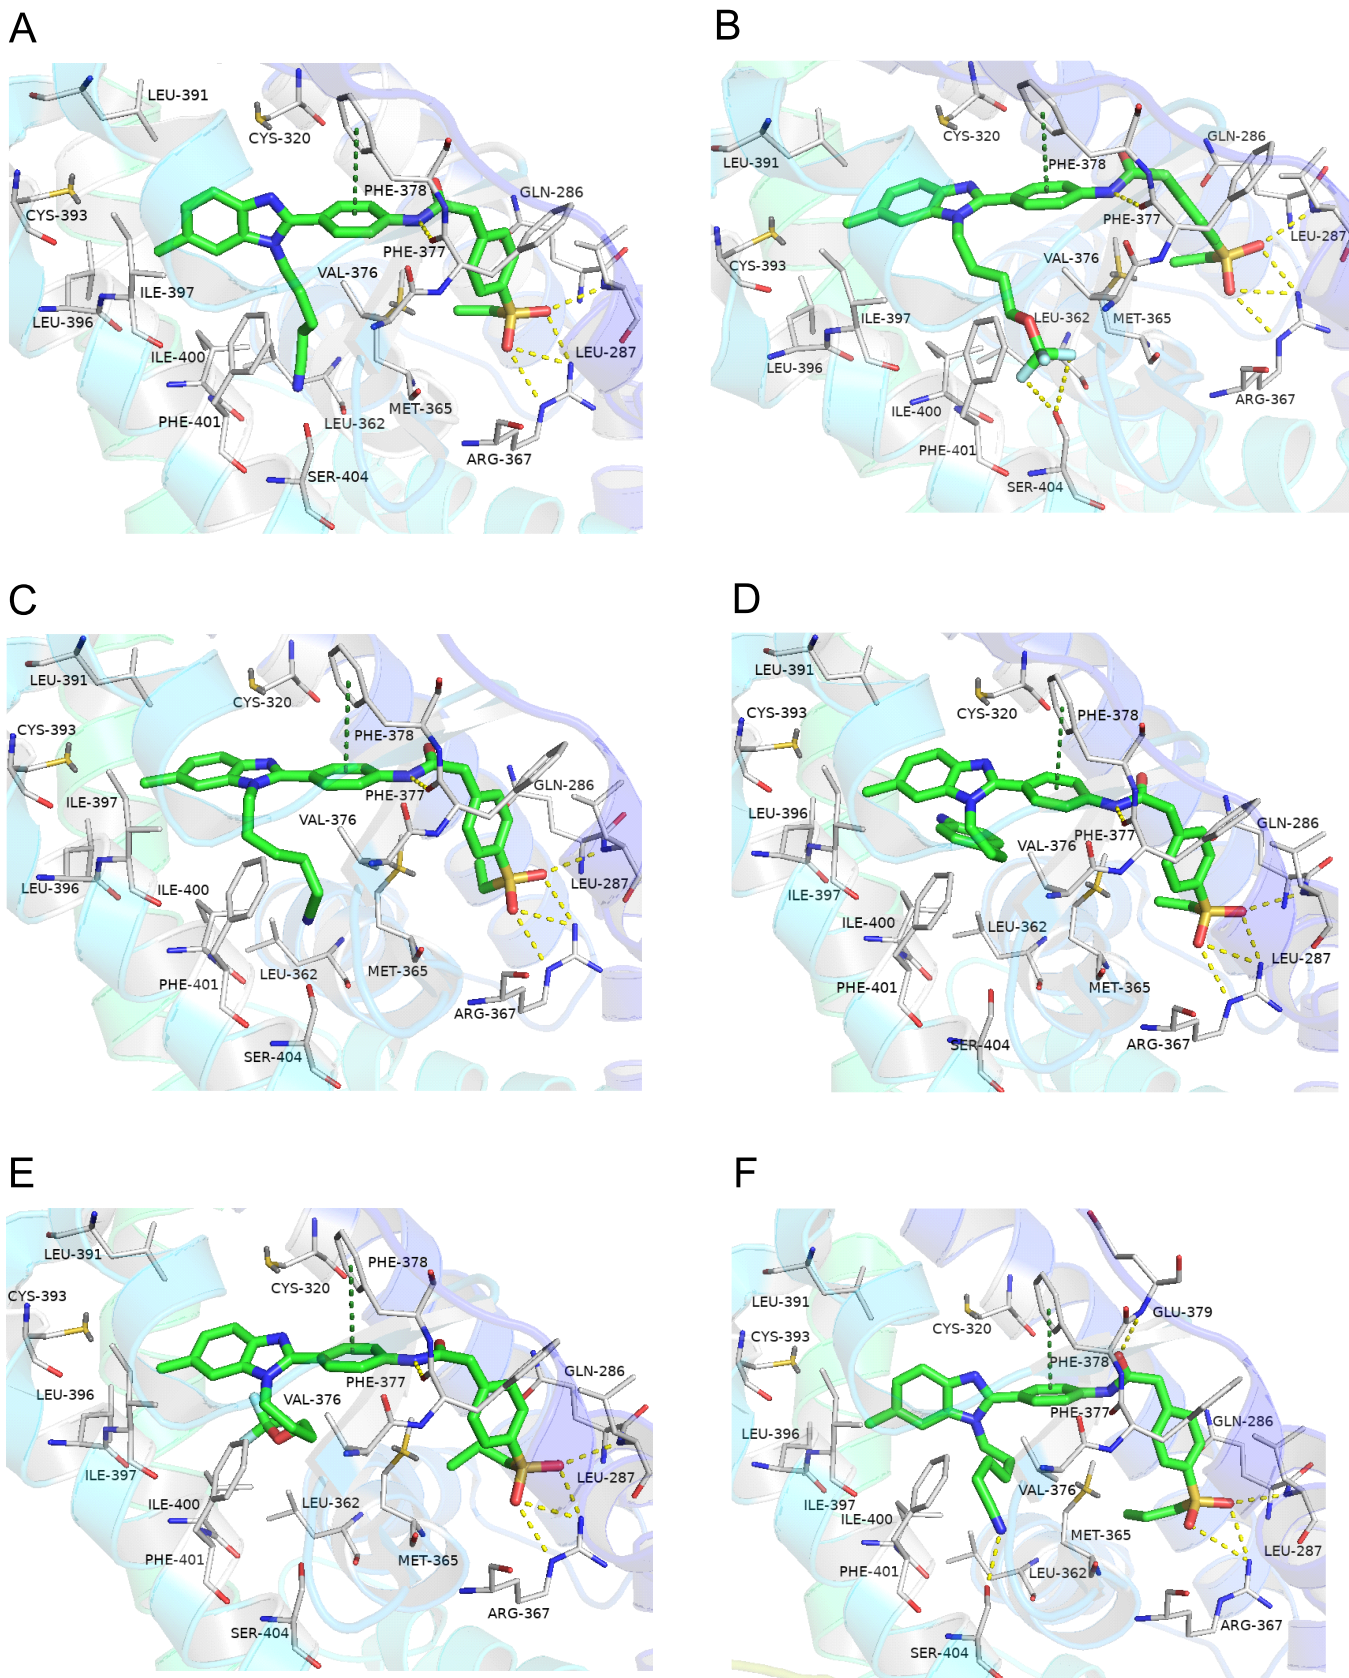

**Fig. S1** Docking results of the designed compounds **D01** (A), **D02** (B), **D03** (C), **D04** (D), **D05** (E) and **D06** (F) in the binding site of the protein (PDB code: 6J1L). The ligands and important residues are shown as sticks. The hydrogen bonds and  $\pi$ - $\pi$  interactions are shown as yellow and green dashed lines, respectively.

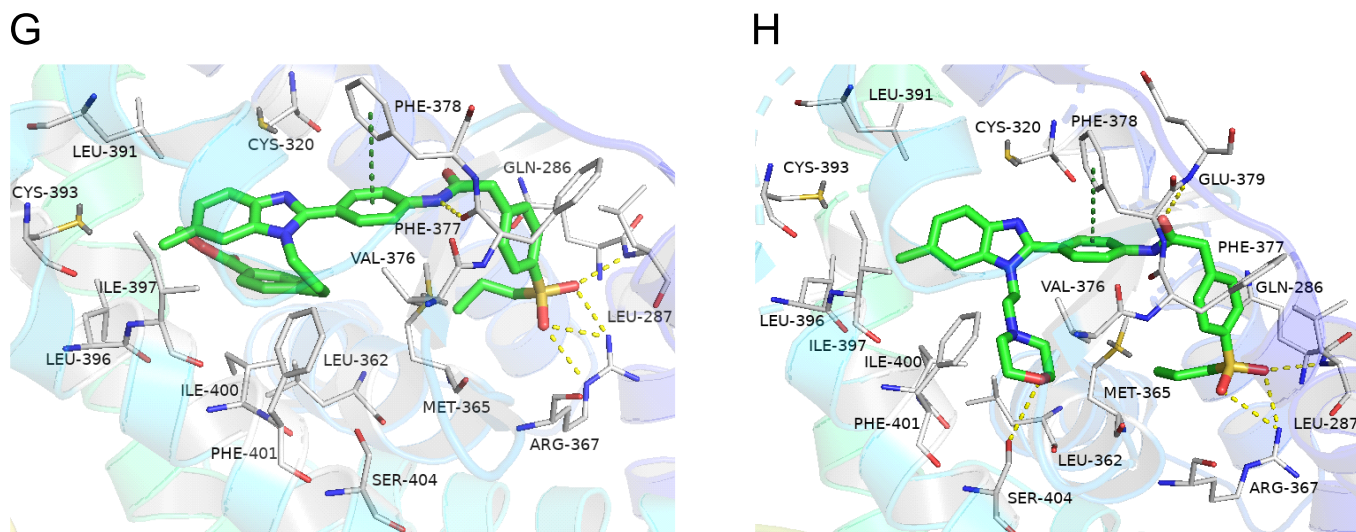

**Fig. S2** Docking results of the designed compounds **D08** (G) and **D10** (H) in the binding site of the protein (PDB code: 6J1L). The ligands and important residues are shown as sticks. The hydrogen bonds and  $\pi$ - $\pi$  interactions are shown as yellow and green dashed lines, respectively.

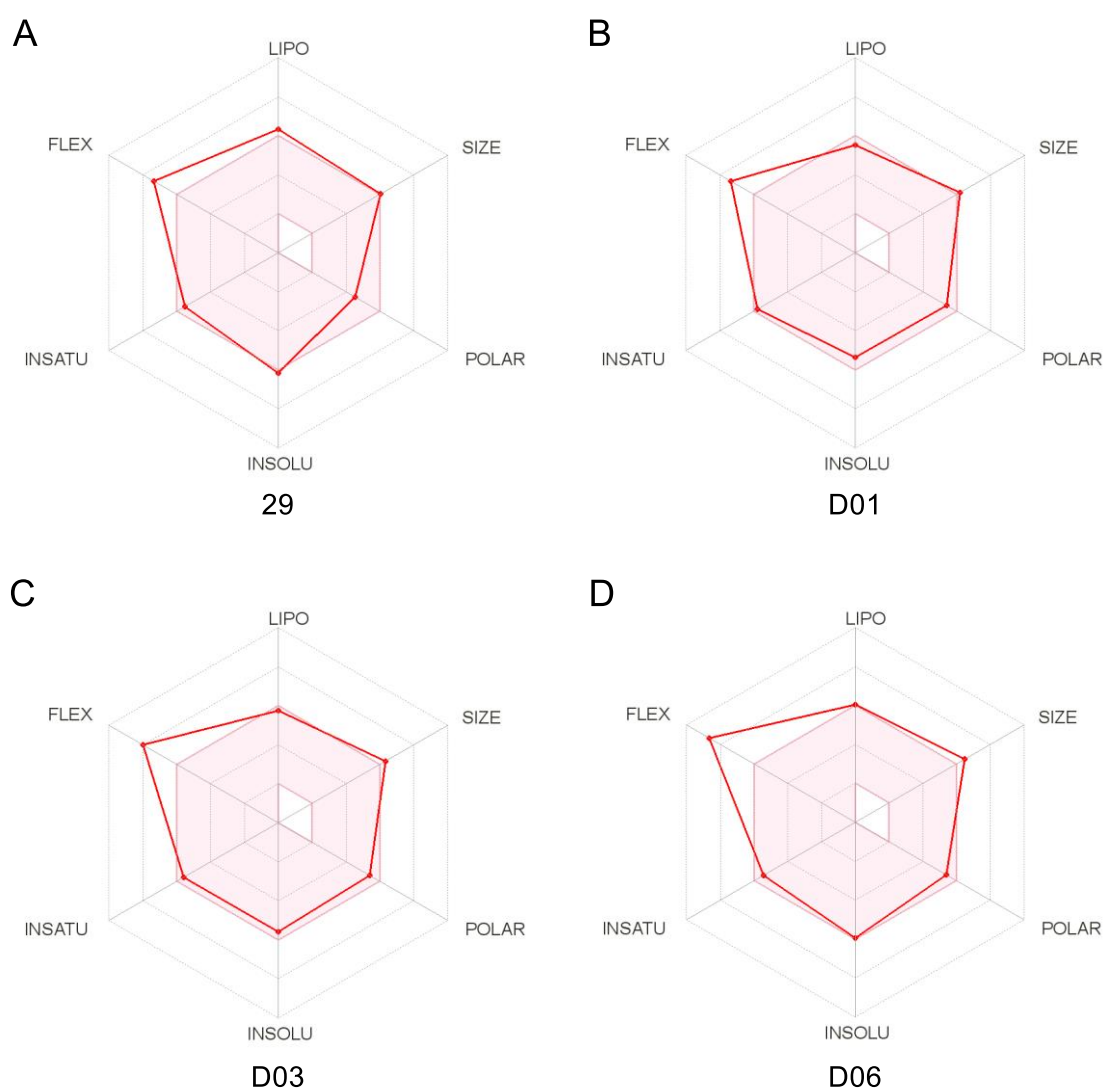

**Fig. S3** The bioavailability radars for compounds **29** (A), **D01** (B), **D03** (C) and **D06** (D).
